# Supplementary figures and images for: FluoroTome 1: An Apparatus for Tomographic Imaging of Radio-Fluorogenic (RFG) Gels
Source: MDPI journal article supplement (doi:10.3390/polym11111729), 2019-10-23

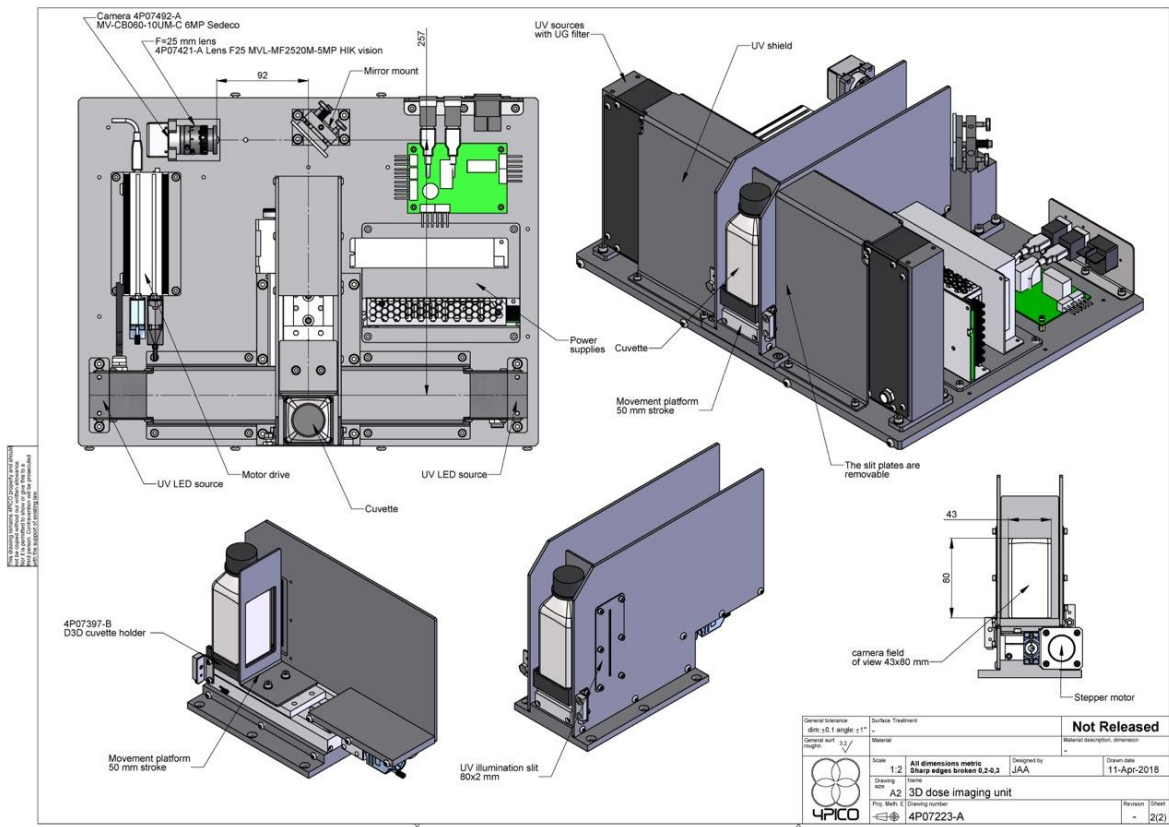

Supplement: s1 [file s1]
